# Supplementary material for: HONO chemistry at a suburban site during the EXPLORE-YRD campaign in 2018: HONO formation mechanisms and impacts on O 3 production
Source: Copernicus journal article supplement (doi:10.5194/egusphere-2023-1058), 2023-07-06
Supplement: Supplementary file 1 [file egusphere-2023-1058-supplement.pdf]

# Supporting Information

## HONO chemistry at a suburban site during the EXPLORE-YRD campaign in 2018: HONO formation mechanisms and impacts on O<sub>3</sub> production

Can Ye<sup>1</sup>, Keding Lu<sup>1</sup>, Xuefei Ma<sup>1</sup>, Wanyi Qiu<sup>1</sup>, Shule Li<sup>1</sup>, Xiping Yang<sup>2</sup>, Chaoyang Xue<sup>3</sup>, Tianyu Zhai<sup>1</sup>, Yuhan Liu<sup>1</sup>, Xuan Li<sup>1</sup>, Yang Li<sup>1</sup>, Haichao Wang<sup>1</sup>, Zhaofeng Tan<sup>1</sup>, Xiaorui Chen<sup>1</sup>, Huabin Dong<sup>1</sup>, Limin Zeng<sup>1</sup>, Min Hu<sup>1</sup>, Yuanhang Zhang<sup>1</sup>

<sup>1</sup> State Key Joint Laboratory of Environment Simulation and Pollution Control, College of Environmental Sciences and Engineering, Peking University, Beijing, 100871, China

<sup>2</sup> State Environmental Protection Key Laboratory of Vehicle Emission Control and Simulation, Chinese Research Academy of Environmental Sciences, Beijing, 100012, China

<sup>3</sup> Max Planck Institute for Chemistry, Mainz 55128, Germany

Correspondence to: Keding Lu ([k.lu@pku.edu.cn](mailto:k.lu@pku.edu.cn)), Yuanhang Zhang ([yhzhang@pku.edu.cn](mailto:yhzhang@pku.edu.cn))

15

20 **Table S1:** Measured parameters and corresponding measurement techniques

**Figure S1:** Averaged diurnal pattern of observed and modeled PAN if A first-order dilution loss term with a lifetime of 8 hours was incorporated.

**Figure S2:** Calculated HONO diurnal profile contributed by vehicle emissions.

**Figure S3:** The comparison of modeled OH concentration with and without observed HONO as a model constraint.

25

30

**Table S1:** Measured parameters and corresponding measurement techniques

| Parameters                                                                                                    | Limit of detection              | Methods                                    | Accuracy |
|---------------------------------------------------------------------------------------------------------------|---------------------------------|--------------------------------------------|----------|
| HONO                                                                                                          | 5 ppt                           | LOPAP                                      | ±10%     |
| OH                                                                                                            | $6 \times 10^5 \text{ cm}^{-3}$ | LIF                                        | ±10%     |
| NO                                                                                                            | 60 ppt                          | Chemiluminescence                          | ±20%     |
| NO <sub>2</sub>                                                                                               | 0.3 ppb                         | Chemiluminescence+<br>Photolytic converter | ±20%     |
| O <sub>3</sub>                                                                                                | 0.5 ppb                         | UV photometry                              | ±5%      |
| CO                                                                                                            | 1 ppb                           | Infrared absorption                        | ±1 ppb   |
| SO <sub>2</sub>                                                                                               | 0.1 ppb                         | Pulsed UV fluorescence                     | ±5%      |
| S <sub>a</sub>                                                                                                | 14-700 nm                       | SMPS                                       | ±20%     |
| HCHO                                                                                                          | 25 ppt                          | Hantzsch fluorimetry                       | ±5%      |
| VOCs                                                                                                          | 20-300 ppt                      | GC-FID/MS                                  | ±15%     |
| PM <sub>2.5</sub>                                                                                             | $0.1 \mu\text{g m}^{-3}$        | TEOM                                       | ±5%      |
| NH <sub>4</sub> <sup>+</sup> , SO <sub>4</sub> <sup>2-</sup> , NO <sub>3</sub> <sup>-</sup> , Cl <sup>-</sup> | $0.05 \mu\text{g m}^{-3}$       | GAC-IC                                     | ±20%     |

35

40

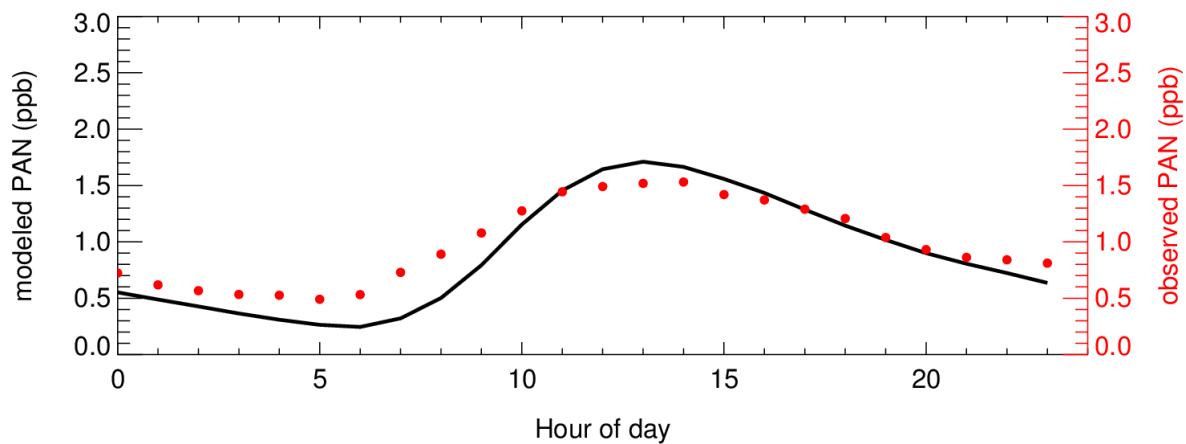

**Figure S1:** Averaged diurnal pattern of observed and modeled PAN if A first-order dilution loss term with a lifetime of 8 hours was incorporated.

45

50

55

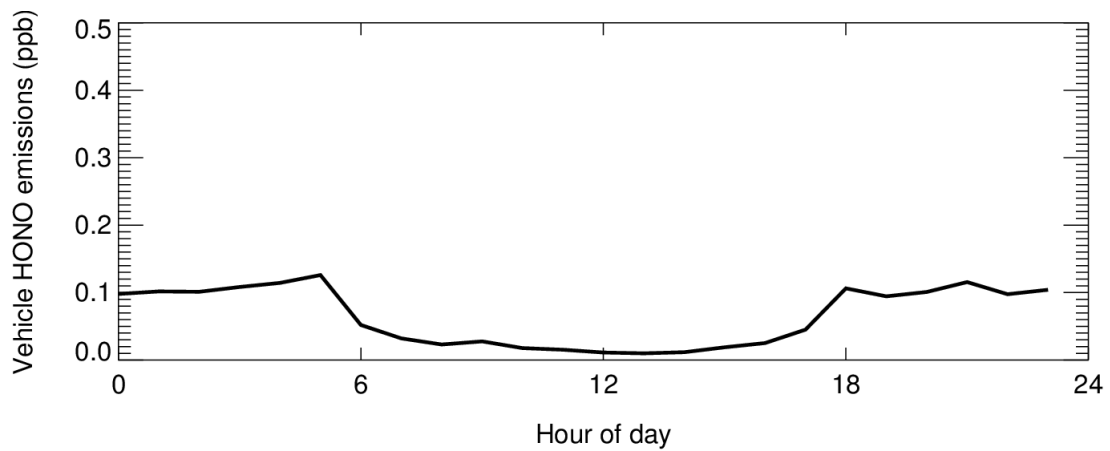

**Figure S2:** Calculated HONO diurnal profile contributed by vehicle emissions.

60

65

70

75

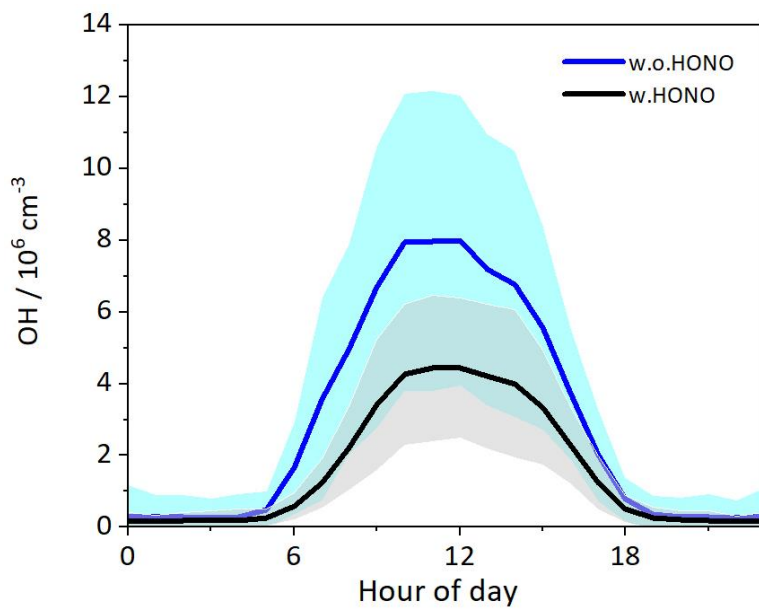

**Figure S3:** The comparison of modeled OH concentration with and without observed HONO as a model constraint.
