# Supplementary material for: HONO chemistry at a suburban site during the EXPLORE-YRD campaign in 2018: HONO formation mechanisms and impacts on O 3 production
Source: Copernicus journal article supplement (doi:10.5194/egusphere-2023-1058), 2023-07-06
Supplement: Supplementary file [file egusphere-2023-1058-AC3-supplement.pdf]

Response to referee 3:

The authors would like to thank the anonymous referee 3 for taking the time to review the manuscript. We thank for validating our work and for providing us with valuable insights that allowed us to improve the manuscript. Comments by the reviewer are given in black normal font, and our response to the comments is shown in blue. Newly added and modified text in the revised manuscript and supporting information (SI) is given in italics.

Ye et al. examined HONO chemistry and its impact on ozone formation using a field campaign measurement and box modeling. They found a high HONO/NO<sub>x</sub> ratio of 0.17 around noon coinciding with high J(O<sup>1</sup>D), which suggests the importance of photo-induced sources for HONO formation. This is furthered verified by statistical analysis and box modeling with updated parameterization. They also demonstrated HONO chemistry can greatly enhance net ozone production by 45%.

Overall, this is a well-executed study and the key conclusions are reasonably defended. In particular, the observational constraint for HONO chemistry from EXPLORE-YRD campaign adds important evidence to the understanding of HONO formation. However, I suggest the authors to discuss more broadly the HONO formation chemistry under different chemical conditions. I would recommend its publication after revision.

Thank you for your positive comments on this study.

We have expanded some discussion on HONO formation chemistry under different chemical conditions:

Line 446-454:

*“Despite a good match between observed and measured HONO during most days, HONO was still underestimated after fertilization events, indicating the strong influence of soil HONO emission on HONO budget in areas surrounded by agricultural fields. Therefore, soil HONO emission should be well constrained, especially for rural areas during fertilization periods. In addition, while nitrate photolysis played a negligible role in HONO formation in our study, it may play a more important role in winter polluted periods with high nitrate loadings. Our study highlighted important role of NO<sub>2</sub> conversion on ground surface. Previous studies found some coexisted gas species like NH<sub>3</sub>, CO<sub>2</sub> may promote HONO production by NO<sub>2</sub> heterogeneous reaction (Li et al., 2018; Xu et al., 2019; Liu et al., 2023; Xia et al., 2021). Thereby, laboratory experiments investigating heterogeneous NO<sub>2</sub> conversion on ground surface with these species present are needed for better representation of HONO formation in models.”*

The authors highlighted HONO production from NO<sub>2</sub> heterogeneous conversion at ground. But how is daytime PM<sub>2.5</sub> concentration during EXPLORE-YRD? I am wondering if the importance of aerosol update will increase over a severe PM<sub>2.5</sub> pollution episode. Some discussion on the application of key conclusion from this study is required.

The times series of PM<sub>2.5</sub> was shown in Figure 1 in the revised manuscript. We can

clearly see that the maximum PM<sub>2.5</sub> concentration during the daytime was below 100 µg m<sup>-3</sup>. HONO production by NO<sub>2</sub> uptake on aerosol surface can be expressed as follows:

$$P_{\text{aerosol+hv}} = \frac{1}{4} \gamma_{\text{aerosol+hv}} \times \frac{j(\text{NO}_2)}{0.005 \text{ s}^{-1}} \times [\text{NO}_2] \times v_{\text{NO}_2} \times S_a$$

If we take an  $\gamma_{\text{aerosol+hv}}$  of  $2 \times 10^{-5}$  and double daytime PM<sub>2.5</sub> concentrations (assuming  $S_a$  was linearly correlated with PM<sub>2.5</sub> concentrations), then the HONO production by NO<sub>2</sub> uptake on aerosol surface was shown below (Figure R1):

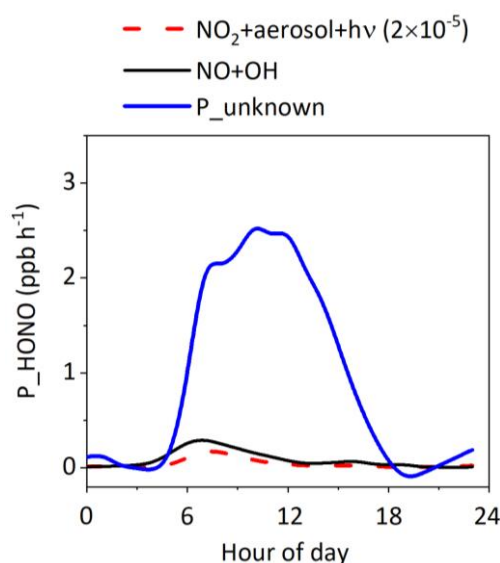

Figure R1. HONO production rates by photo-induced NO<sub>2</sub> conversion on the aerosol surface.

Despite doubling daytime PM<sub>2.5</sub> concentrations, HONO production was still much lower than unknown sources, and also lower than NO+OH, implying NO<sub>2</sub> uptake on aerosol surface was not important in our study. Compared to NO<sub>2</sub> conversion on ground surface, NO<sub>2</sub> conversion on aerosol surface was minor, which was ascribed to much smaller surface area to volume ratio ( $<0.01 \text{ m}^{-1}$  vs  $0.3 \text{ m}^{-1}$ )

Our study provides three important hints: 1) NO<sub>2</sub> heterogeneous on ground surface dominated HONO production; 2) soil HONO emission may become an important source in rural area with large areas of agricultural fields during fertilization period; 3) HONO greatly aggravated O<sub>3</sub> pollution in China. Our study has important implication on O<sub>3</sub> mitigation for policymakers. Controlling HONO production may provide an alternative pathway for O<sub>3</sub> mitigation. We have added the following discussion on the application from our study in the revised manuscript:

Line 492-504:

*“In addition, now most studies are focusing on VOCs and NO<sub>x</sub> reduction to achieve O<sub>3</sub> mitigation. However, O<sub>3</sub> formation showed non-linear relationship on VOCs and NO<sub>x</sub>, making it difficult to decrease O<sub>3</sub> by solely reducing VOCs or NO<sub>x</sub>. For instance, during COVID-19 lockdown period, O<sub>3</sub> showed an evident increase while NO<sub>x</sub> and VOCs*

showed a decrease trend, highlight the complexity of  $O_3$  mitigation (Zhao et al., 2020; Wang et al., 2022). Our results suggested HONO contributed significantly to  $O_3$  production in China, and thereby, reducing HONO production may be an alternative way for  $O_3$  control. As  $NO_2$  heterogeneous reactions on the ground surface were important sources for HONO production, reducing  $NO_x$  emissions would be beneficial for reducing HONO emissions. However,  $NO_x$  reduction may also lead to more  $O_3$  production if  $O_3$  formation is in a VOC-limited regime, and hence the overall effects of  $NO_x$  reduction on  $O_3$  should be evaluated by chemical transport models. Moreover, soil HONO emissions may become an important source in rural area with large areas of agricultural fields. Decreasing soil HONO emissions is beneficial for  $O_3$  pollution control, especially during fertilization period in June when the  $O_3$  pollution was severe. Therefore, more environmental-friendly fertilization amount and fertilization mode should be investigated to decrease soil HONO emissions.”

L43: please spell out “SOA”

As suggested, “SOA” has changed to “secondary organic aerosol (SOA)”.

L166-167: any reference for “a lifetime of 8 hours”?

For reference, we have added a study by Ma et al. (2020). We assumed a lifetime of 8 hours with the aim of considering the loss by transportation and deposition. If this loss was incorporated, the modeled PAN agreed very well with observed PAN in this campaign (Figure S1), suggesting this incorporation was reasonable.

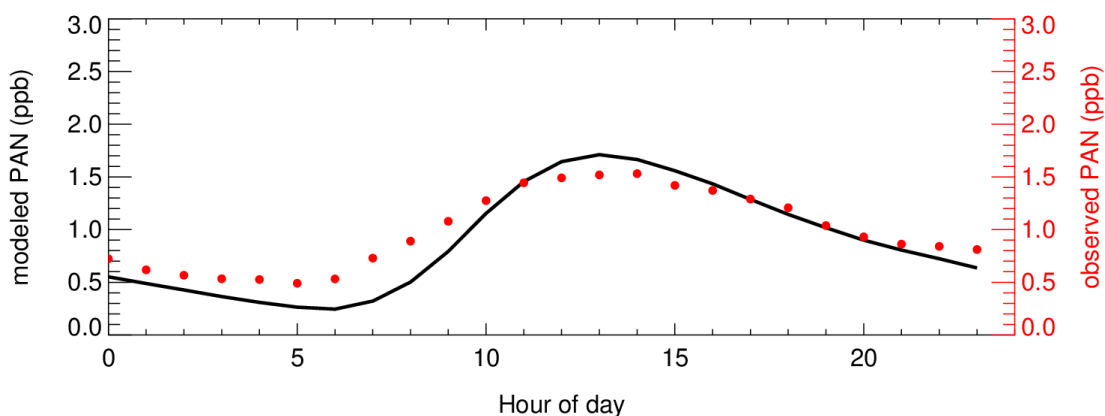

Figure S2. Averaged diurnal pattern of observed and modeled PAN if A first-order dilution loss term with a lifetime of 8 hours was incorporated.

L251: this argument should be further justified.

As suggested, we have revised the corresponding texts:

Line 249-251:

“In addition, considering that the observation period covered the fertilization period in June, the high HONO/ $NO_x$  in our study may be partially explained by direct soil HONO

*emissions around the sampling sites.”*

In Fig.1, The website of TROPOMI NO<sub>2</sub> data product should be provided.

We have provided the following website of TROPOMI NO<sub>2</sub> data product:

<https://s5phub.copernicus.eu/dhus>

Reference:

Li, L., Duan, Z. Y., Li, H., Zhu, C. Q., Henkelman, G., Francisco, J. S., and Zeng, X. C.: Formation of HONO from the NH<sub>3</sub>-promoted hydrolysis of NO<sub>2</sub> dimers in the atmosphere, *P Natl Acad Sci USA*, 115, 7236-7241, 10.1073/pnas.1807719115, 2018.

Liu, J., Li, B., Deng, H., Yang, Y., Song, W., Wang, X., Luo, Y., Francisco, J. S., Li, L., and Gligorovski, S.: Resolving the Formation Mechanism of HONO via Ammonia-Promoted Photosensitized Conversion of Monomeric NO<sub>2</sub> on Urban Glass Surfaces, *Journal of the American Chemical Society*, 145, 11488-11493, 10.1021/jacs.3c02067, 2023.

Ma, X. F., Tan, Z. F., Lu, K. D., Yang, X. P., Chen, X. R., Wang, H. C., Chen, S. Y., Fang, X., Li, S. L., Li, X., Liu, J. W., Liu, Y., Lou, S. R., Qiu, W. Y., Wang, H. L., Zeng, L. M., and Zhang, Y. H.: OH and HO<sub>2</sub> radical chemistry at a suburban site during the EXPLORE-YRD campaign in 2018, *Atmos Chem Phys*, 22, 7005-7028, 10.5194/acp-22-7005-2022, 2022.

Wang, H., Huang, C., Tao, W., Gao, Y., Wang, S., Jing, S., Wang, W., Yan, R., Wang, Q., An, J., Tian, J., Hu, Q., Lou, S., Pöschl, U., Cheng, Y., and Su, H.: Seasonality and reduced nitric oxide titration dominated ozone increase during COVID-19 lockdown in eastern China, *npj Climate and Atmospheric Science*, 5, 24, 10.1038/s41612-022-00249-3, 2022.

Xia, D. M., Zhang, X. R., Chen, J. W., Tong, S. R., Xie, H. B., Wang, Z. Y., Xu, T., Ge, M. F., and Allen, D. T.: Heterogeneous Formation of HONO Catalyzed by CO<sub>2</sub>, *Environ Sci Technol*, 55, 12215-12222, 10.1021/acs.est.1c02706, 2021.

Xu, W., Kuang, Y., Zhao, C., Tao, J., Zhao, G., Bian, Y., Yang, W., Yu, Y., Shen, C., Liang, L., Zhang, G., Lin, W., and Xu, X.: NH<sub>3</sub>-promoted hydrolysis of NO<sub>2</sub> induces explosive growth in HONO, *Atmos. Chem. Phys.*, 19, 10557-10570, 10.5194/acp-19-10557-2019, 2019.

Zhao, Y., Zhang, K., Xu, X., Shen, H., Zhu, X., Zhang, Y., Hu, Y., and Shen, G.: Substantial Changes in Nitrogen Dioxide and Ozone after Excluding Meteorological Impacts during the COVID-19 Outbreak in Mainland China, *Environmental Science & Technology Letters*, 7, 402-408, 10.1021/acs.estlett.0c00304, 2020.
